# Supplementary material for: Physicochemical and Organoleptic Differences in Chardonnay Chilean Wines after Ethanol Reduction Practises: Pre-Fermentative Water Addition or Metschnikowia pulcherrima
Source: MDPI journal article supplement (doi:10.3390/fermentation9090808), 2023-09-02
Supplement: s1 [file s1]

## Supplementary data

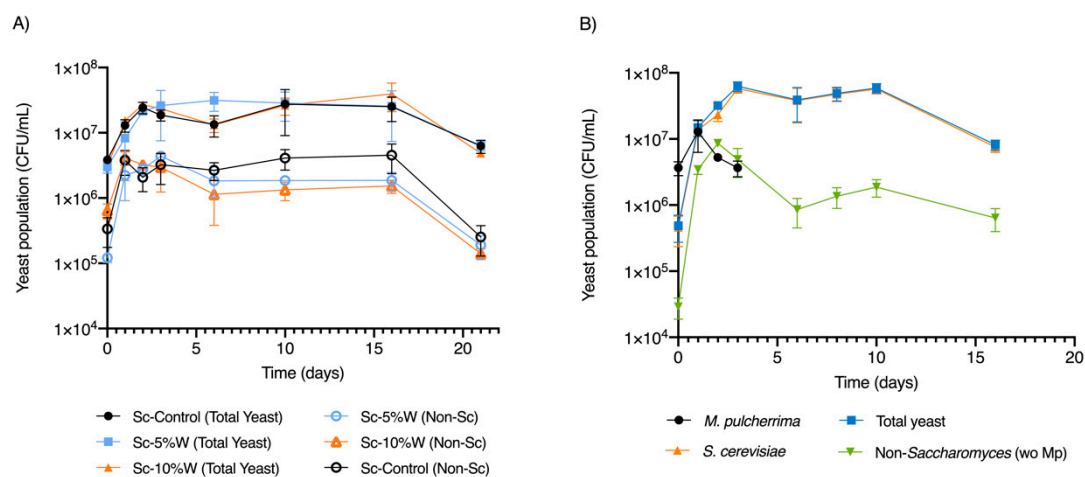

Figure S1. A) Sc-Control, Sc-5%W and Sc-10%W yeast populations during AF. B) Mp-Sc yeast populations during AF. The Sc-Control represents wines fermented solely with *S. cerevisiae*, while Sc-5%W and Sc-10%W indicate wines with a pre-fermentative water addition of 5% and 10%, respectively. The Mp+Sc wines depict sequential fermentation with *M. pulcherrima* and *S. cerevisiae*. Means accompanied by standard deviations (SD) based on three replicates (n=3).

Table S1. Maximal Consumption Rate (g/L/day) and days to consume 50% of sugars (T50%). The Sc-Control represents wines fermented solely with *S. cerevisiae*, while Sc-5%W and Sc-10%W indicate wines with a pre-fermentative water addition of 5% and 10%, respectively. The Mp+Sc wines depict sequential fermentation with *M. pulcherrima* and *S. cerevisiae*

|                                        | Sc-Control         | Sc-5%W                | Sc-10%W            | Mp+Sc              |
|----------------------------------------|--------------------|-----------------------|--------------------|--------------------|
| <b>Max. Consumption Rate (g/L/day)</b> | $13.61 \pm 0.49^b$ | $13.37 \pm 0.32^{ab}$ | $12.37 \pm 0.06^a$ | $26.20 \pm 0.62^c$ |
| <b>T 50% (days)</b>                    | $5.44 \pm 0.02^b$  | $5.45 \pm 0.07^b$     | $5.69 \pm 0.04^c$  | $3.75 \pm 0.04^a$  |

Different lowercase letters indicate the existence of significant difference between the samples ( $p < 0.05$ ). Data are expressed as the mean of three experimental replicates  $\pm$  standard deviation.

Table S2. Low-molecular-mass phenolic compounds in wines (mg/L). The Sc-Control represents wines fermented solely with *S. cerevisiae*, while Sc-5%W and Sc-10%W indicate wines with a pre-fermentative water addition of 5% and 10%, respectively. The Mp+Sc wines depict sequential fermentation with *M. pulcherrima* and *S. cerevisiae*.

|                                                | Sc-Control                 | Sc-5%W                     | Sc-10%W                   | Mp+Sc                     |
|------------------------------------------------|----------------------------|----------------------------|---------------------------|---------------------------|
| <b>Hydroxybenzoic acids and derivatives</b>    |                            |                            |                           |                           |
| Gallic acid                                    | 1.01 ± 0.23 <sup>ab</sup>  | 0.87 ± 0.09 <sup>ab</sup>  | 0.59 ± 0.13 <sup>a</sup>  | 1.23 ± 0.23 <sup>b</sup>  |
| Protocatechuic acid                            | 0.86 ± 0.18 <sup>ab</sup>  | 1.32 ± 0.14 <sup>b</sup>   | 0.78 ± 0.18 <sup>a</sup>  | 1.34 ± 0.27 <sup>b</sup>  |
| $\Sigma$ Hydroxybenzoic acids and derivatives  | 1.88 ± 0.40 <sup>ab</sup>  | 2.19 ± 0.22 <sup>ab</sup>  | 1.37 ± 0.32 <sup>a</sup>  | 2.57 ± 0.48 <sup>b</sup>  |
| <b>Hydroxycinnamic acids and derivatives</b>   |                            |                            |                           |                           |
| Trans-caftaric acid                            | 1.05 ± 1.82                | 2.42 ± 0.25                | 0.75 ± 1.29               | 2.48 ± 0.62               |
| Trans-coutaric acid                            | 0.59 ± 0.18                | 0.66 ± 0.25                | 0.49 ± 0.15               | 0.69 ± 0.27               |
| Cis-coutaric acid                              | 0.95 ± 0.29                | 0.66 ± 0.31                | 0.93 ± 0.27               | 1.24 ± 0.16               |
| Caffeic acid                                   | 1.31 ± 0.16 <sup>b</sup>   | 1.10 ± 0.19 <sup>ab</sup>  | 0.70 ± 0.08 <sup>a</sup>  | 0.78 ± 0.18 <sup>a</sup>  |
| Hexose ester of trans p-coumaric acid          | 0.06 ± 0.01                | 0.09 ± 0.01                | 0.04 ± 0.01               | 0.08 ± 0.04               |
| $\Sigma$ Hydroxycinnamic acids and derivatives | 3.96 ± 2.26                | 4.94 ± 0.68                | 2.90 ± 1.02               | 5.27 ± 0.48               |
| <b>Phenolic alcohols</b>                       |                            |                            |                           |                           |
| Tyrosol                                        | 0.94 ± 0.04                | 0.82 ± 0.08                | 0.81 ± 0.06               | 0.85 ± 0.07               |
| <b>Flavanols</b>                               |                            |                            |                           |                           |
| Catechin                                       | 1.89 ± 0.57                | 2.17 ± 0.29                | 2.13 ± 0.02               | 2.07 ± 0.37               |
| Epicatechin                                    | 8.30 ± 0.70 <sup>b</sup>   | 6.60 ± 0.32 <sup>a</sup>   | 6.16 ± 0.14 <sup>a</sup>  | 9.47 ± 0.18 <sup>c</sup>  |
| Procianidin 1                                  | 0.97 ± 0.21                | 0.85 ± 0.23                | 0.56 ± 0.11               | 0.87 ± 0.24               |
| Procianidin 2                                  | 0.95 ± 0.22                | 0.83 ± 0.23                | 0.61 ± 0.07               | 1.03 ± 0.16               |
| Procianidin 3                                  | 1.95 ± 0.15 <sup>c</sup>   | 1.51 ± 0.25 <sup>c</sup>   | 1.17 ± 0.07 <sup>b</sup>  | 1.84 ± 0.03 <sup>a</sup>  |
| Procianidin 4                                  | 0.26 ± 0.14                | 0.84 ± 0.17                | 0.56 ± 0.08               | 0.61 ± 0.04               |
| $\Sigma$ Flavanols                             | 14.33 ± 2.19 <sup>ab</sup> | 12.80 ± 0.41 <sup>ab</sup> | 11.18 ± 0.19 <sup>a</sup> | 15.89 ± 0.76 <sup>b</sup> |
| <b>Flavonols</b>                               |                            |                            |                           |                           |
| Astibilin                                      | 3.23 ± 0.99                | 2.54 ± 0.11                | 2.17 ± 0.15               | 3.22 ± 0.02               |
| Quercetin                                      | 0.92 ± 0.11 <sup>c</sup>   | 0.40 ± 0.09 <sup>b</sup>   | 0.31 ± 0.05 <sup>a</sup>  | 0.61 ± 0.12 <sup>ab</sup> |
| Quercetin 3-B-D galactoside                    | 1.23 ± 0.45                | 1.16 ± 0.22                | 0.47 ± 0.82               | 1.09 ± 0.32               |
| Quercetina 3-B-D glucoside                     | 0.42 ± 0.13 <sup>a</sup>   | 0.24 ± 0.08 <sup>ab</sup>  | 0.15 ± 0.01 <sup>ab</sup> | 0.29 ± 0.13 <sup>a</sup>  |
| Flavonol 1                                     | 0.17 ± 0.14                | 0.11 ± 0.06                | 0.04 ± 0.01               | 0.06 ± 0.01               |
| Flavonol 2                                     | 1.86 ± 0.64                | 1.90 ± 0.12                | 1.33 ± 0.15               | 2.15 ± 0.61               |
| Flavonol 3                                     | 0.23 ± 0.16                | 0.22 ± 0.05                | 0.02 ± 0.04               | 0.11 ± 0.07               |
| Flavonol 4                                     | 1.46 ± 0.14 <sup>c</sup>   | 1.06 ± 0.23 <sup>b</sup>   | 0.70 ± 0.03 <sup>a</sup>  | 0.84 ± 0.03 <sup>ab</sup> |
| $\Sigma$ Flavonols                             | 9.51 ± 2.49 <sup>b</sup>   | 7.63 ± 0.77 <sup>ab</sup>  | 5.19 ± 0.87 <sup>ab</sup> | 8.36 ± 1.09 <sup>a</sup>  |
| <b>Total</b>                                   | 39.09 ± 6.79 <sup>ab</sup> | 35.77 ± 0.89 <sup>ab</sup> | 28.68 ± 2.88 <sup>a</sup> | 40.55 ± 2.79 <sup>b</sup> |

Different lowercase letters indicate the existence of significant difference between the samples ( $p < 0.05$ ). Data are expressed as the mean of three experimental replicates ± standard deviation.

Table S3. Volatile compounds detected in wines (relative area). The Sc-Control represents wines fermented solely with *S. cerevisiae*, while Sc-5%W and Sc-10%W indicate wines with a pre-fermentative water addition of 5% and 10%, respectively. The Mp+Sc wines depict sequential fermentation with *M. pulcherrima* and *S. cerevisiae*.

| *Relative area           | Sc-Control   | Sc-5%W       | Sc-10%W      | Mp+Sc        |
|--------------------------|--------------|--------------|--------------|--------------|
| <b>Esters</b>            |              |              |              |              |
| <b>Acetate esters</b>    |              |              |              |              |
| Ethyl acetate            | 5.23 ± 0.14  | 4.10 ± 0.57  | 4.21 ± 0.22  | 5.28 ± 0.30  |
| Isobutyl acetate         | 0.31 ± 0.03  | 0.27 ± 0.03  | 0.09 ± 0.01  | 0.37 ± 0.02  |
| Isoamyl acetate          | 8.01 ± 0.27  | 5.92 ± 0.24  | 6.11 ± 0.43  | 7.33 ± 0.44  |
| Hexyl acetate            | 3.02 ± 0.20  | 2.13 ± 0.59  | 2.39 ± 0.19  | 1.84 ± 0.11  |
| 3-Hexenyl acetate        | 0.04 ± 0.01  | 0.03 ± 0.01  | 0.03 ± 0.01  | 0.04 ± 0.01  |
| Heptyl acetate           | 0.05 ± 0.01  | 0.04 ± 0.02  | 0.04 ± 0.01  | 0.05 ± 0.01  |
| 2-Phenethyl acetate      | 5.67 ± 0.42  | 5.35 ± 0.62  | 4.46 ± 0.40  | 6.37 ± 0.65  |
| <b>Ethyl esters</b>      |              |              |              |              |
| Ethyl butanoate          | 0.58 ± 0.02  | 0.38 ± 0.03  | 0.41 ± 0.01  | 0.54 ± 0.02  |
| Ethyl hexanoate          | 10.47 ± 0.73 | 7.15 ± 2.17  | 7.82 ± 0.43  | 8.26 ± 0.60  |
| Ethyl heptanoate         | 0.02 ± 0.01  | 0.02 ± 0.01  | 0.02 ± 0.01  | 0.02 ± 0.01  |
| Ethyl octanoate          | 30.22 ± 0.68 | 20.13 ± 5.85 | 20.03 ± 2.06 | 25.91 ± 2.13 |
| Ethyl 7-octenoate        | 0.11 ± 0.01  | 0.09 ± 0.02  | 0.07 ± 0.01  | 0.10 ± 0.01  |
| Ethyl nonanoate          | 0.03 ± 0.01  | 0.03 ± 0.01  | 0.03 ± 0.01  | 0.04 ± 0.01  |
| Ethyl decanoate          | 13.27 ± 2.04 | 10.58 ± 2.16 | 8.59 ± 0.59  | 9.84 ± 2.11  |
| Ethyl 4E-decenoate       | 0.04 ± 0.01  | 0.04 ± 0.01  | 0.03 ± 0.01  | 0.08 ± 0.01  |
| Ethyl dodecanoate        | 4.93 ± 1.23  | 5.19 ± 0.33  | 2.71 ± 0.24  | 3.51 ± 0.88  |
| Ethyl tetradecanoate     | 0.15 ± 0.08  | 0.15 ± 0.03  | 0.10 ± 0.01  | 0.20 ± 0.02  |
| Ethyl hexadecanoate      | 0.16 ± 0.10  | 0.25 ± 0.01  | 0.22 ± 0.01  | 0.36 ± 0.02  |
| <b>Other esters</b>      |              |              |              |              |
| Isoamyl octanoate        | 0.32 ± 0.08  | 0.42 ± 0.06  | 0.42 ± 0.05  | 0.48 ± 0.04  |
| Isoamyl decanoate        | 0.16 ± 0.04  | 0.20 ± 0.01  | 0.17 ± 0.01  | 0.10 ± 0.02  |
| Isobutyl hexanoate       | 0.04 ± 0.01  | 0.04 ± 0.01  | 0.03 ± 0.01  | 0.05 ± 0.01  |
| Isobutyl octanoate       | 0.07 ± 0.02  | 0.06 ± 0.01  | 0.05 ± 0.01  | 0.10 ± 0.01  |
| Butyl 9-decenoate        | 0.04 ± 0.01  | 0.07 ± 0.01  | 0.06 ± 0.01  | 0.14 ± 0.01  |
| Methyl octanoate         | 0.15 ± 0.01  | 0.13 ± 0.01  | 0.13 ± 0.03  | 0.16 ± 0.01  |
| Methyl decanoate         | 0.12 ± 0.04  | 0.14 ± 0.02  | 0.10 ± 0.03  | 0.08 ± 0.02  |
| Methyl 4-decenoate       | 0.04 ± 0.01  | 0.04 ± 0.01  | 0.02 ± 0.01  | 0.07 ± 0.01  |
| Methyl undecanoate       | 0.06 ± 0.01  | 0.09 ± 0.02  | 0.04 ± 0.01  | 0.15 ± 0.03  |
| <b>Alcohols</b>          |              |              |              |              |
| Fusel alcohols           |              |              |              |              |
| Isobutanol               | 0.50 ± 0.02  | 1.51 ± 0.20  | 1.38 ± 0.11  | 2.35 ± 0.15  |
| Isoamyl alcohol          | 11.65 ± 0.14 | 10.98 ± 1.16 | 11.03 ± 0.70 | 13.79 ± 1.06 |
| Isohexanol               | 0.05 ± 0.03  | 0.04 ± 0.02  | 0.03 ± 0.01  | 0.05 ± 0.01  |
| 1.3-Methyl-4-penten-1-ol | 0.14 ± 0.01  | 0.12 ± 0.01  | 0.12 ± 0.01  | 0.09 ± 0.01  |
| 1-Hexanol                | 0.66 ± 0.02  | 0.66 ± 0.07  | 0.67 ± 0.04  | 0.71 ± 0.03  |
| 1-Heptanol               | 0.13 ± 0.02  | 0.12 ± 0.01  | 0.12 ± 0.02  | 0.22 ± 0.04  |
| 2.3-Butanediol           | 0.21 ± 0.12  | 0.11 ± 0.05  | 0.04 ± 0.02  | 0.21 ± 0.02  |
| 1-Octanol                | 0.10 ± 0.01  | 0.08 ± 0.01  | 0.08 ± 0.01  | 0.12 ± 0.01  |
| 1-decanol                | 0.09 ± 0.01  | 0.10 ± 0.01  | 0.10 ± 0.01  | 0.11 ± 0.01  |
| 2-phenylethanol          | 10.75 ± 0.86 | 9.71 ± 1.46  | 9.50 ± 0.34  | 15.72 ± 1.75 |
| <b>Acids</b>             |              |              |              |              |
| Acetic acid              | 0.65 ± 0.08  | 0.46 ± 0.21  | 0.37 ± 0.02  | 0.62 ± 0.09  |
| <b>SCFA</b>              |              |              |              |              |
| Isobutyric acid          | 0.05 ± 0.01  | 0.05 ± 0.01  | 0.04 ± 0.01  | 0.09 ± 0.01  |
| Isovaleric acid          | 0.16 ± 0.02  | 0.16 ± 0.03  | 0.12 ± 0.01  | 0.20 ± 0.01  |
| <b>MCFA</b>              |              |              |              |              |
| Hexanoic acid            | 1.33 ± 0.08  | 1.29 ± 0.23  | 1.12 ± 0.12  | 1.09 ± 0.11  |
| Octanoic acid            | 7.22 ± 0.50  | 7.26 ± 0.87  | 6.75 ± 0.77  | 6.29 ± 0.61  |

|                       |             |             |             |             |
|-----------------------|-------------|-------------|-------------|-------------|
| Decanoic acid         | 5.08 ± 0.44 | 5.34 ± 0.84 | 5.09 ± 0.64 | 2.26 ± 0.04 |
| <b>Aldehydes</b>      |             |             |             |             |
| 3-methyl-benzaldehyde | 0.19 ± 0.01 | 0.19 ± 0.02 | 0.23 ± 0.03 | 0.29 ± 0.02 |
| 4-ethyl-benzaldehyde  | 0.05 ± 0.01 | 0.05 ± 0.01 | 0.04 ± 0.01 | 0.06 ± 0.01 |
| <b>Ketones</b>        |             |             |             |             |
| Isovalerone           | 0.11 ± 0.01 | 0.07 ± 0.03 | 0.09 ± 0.01 | 0.10 ± 0.01 |
| 2-Undecanone          | 0.03 ± 0.02 | 0.02 ± 0.01 | 0.02 ± 0.01 | 0.03 ± 0.01 |
| <b>Terpenes</b>       |             |             |             |             |
| Mesitylene            | 0.32 ± 0.13 | 0.23 ± 0.12 | 0.27 ± 0.02 | 0.23 ± 0.06 |
| Benzocyclobutene      | 0.12 ± 0.02 | 0.08 ± 0.03 | 0.08 ± 0.01 | 0.09 ± 0.01 |
| o-Cymene              | 0.04 ± 0.02 | 0.10 ± 0.07 | 0.07 ± 0.05 | 0.13 ± 0.01 |
| Durene                | 0.03 ± 0.01 | 0.03 ± 0.01 | 0.03 ± 0.01 | 0.04 ± 0.01 |
| Linalol               | 0.07 ± 0.01 | 0.07 ± 0.01 | 0.08 ± 0.01 | 0.08 ± 0.01 |
| Terpinen-4-ol         | 0.03 ± 0.01 | 0.03 ± 0.01 | 0.03 ± 0.01 | 0.05 ± 0.01 |
| Caryophyllene         | 0.05 ± 0.02 | 0.05 ± 0.01 | 0.05 ± 0.01 | 0.06 ± 0.01 |
| Nerolidol             | 0.04 ± 0.01 | 0.04 ± 0.01 | 0.05 ± 0.01 | 0.05 ± 0.01 |
| Viridiflorene         | 0.03 ± 0.02 | 0.04 ± 0.01 | 0.03 ± 0.01 | 0.04 ± 0.01 |

Different lowercase letters indicate the existence of significant difference between the samples ( $p < 0.05$ ).  
Data are expressed as the mean of three experimental replicates  $\pm$  standard deviation.
